# Supplementary material for: The Value of Surface Freshwater Supply Services in the Wetlands of Jilin Province, China
Source: MDPI journal article supplement (doi:10.3390/w16020203), 2024-01-06
Supplement: s1 [file s1]

**Table S1.** Selection for calculating the supply value of freshwater resources in Jilin Province wetlands.

| Wetland Type | Wetland Category                 | whether calculated | Explanation                                                                                                                                                                                                                                                                                                                                                                                                                                  |
|--------------|----------------------------------|--------------------|----------------------------------------------------------------------------------------------------------------------------------------------------------------------------------------------------------------------------------------------------------------------------------------------------------------------------------------------------------------------------------------------------------------------------------------------|
| River        | Permanent river (PR)             | √                  | Riverine wetlands have abundant freshwater resources. Floodplain wetlands, on the other hand, tend to be exposed during dry seasons and submerged during wet seasons, making their freshwater resources difficult to use. Therefore, they are not included in this study.                                                                                                                                                                    |
|              | Seasonal rivers (SR)             | √                  |                                                                                                                                                                                                                                                                                                                                                                                                                                              |
|              | Floodplain wetland (FW)          | ×                  |                                                                                                                                                                                                                                                                                                                                                                                                                                              |
| Marsh        | Permanent freshwater marsh (PFM) | √                  | Freshwater resources in marsh wetlands are primarily supplied through groundwater. However, this study mainly focuses on surface freshwater supply. Only under specific conditions can the freshwater resources of herbaceous marshes be effectively utilized; therefore, only the value of freshwater supply from herbaceous marshes is calculated.                                                                                         |
|              | Shrub swamp (SS)                 | ×                  |                                                                                                                                                                                                                                                                                                                                                                                                                                              |
|              | Freshwater swamp forest (FSF)    | ×                  |                                                                                                                                                                                                                                                                                                                                                                                                                                              |
|              | Permanent saline (PS)            | ×                  |                                                                                                                                                                                                                                                                                                                                                                                                                                              |
|              | Seasonal saltwater marsh (SSM)   | ×                  |                                                                                                                                                                                                                                                                                                                                                                                                                                              |
|              | Swampiness of meadow (SM)        | ×                  |                                                                                                                                                                                                                                                                                                                                                                                                                                              |
| Lake         | Permanent freshwater lake (PFL)  | √                  | Lake wetlands have abundant freshwater resources, but saline lakes cannot provide freshwater resources; therefore, they are excluded from the calculation process.                                                                                                                                                                                                                                                                           |
|              | Permanent saline lake (PSL)      | ×                  |                                                                                                                                                                                                                                                                                                                                                                                                                                              |
|              | Seasonal lake (SL)               | ×                  |                                                                                                                                                                                                                                                                                                                                                                                                                                              |
| Artificial   | Reservoir (RE)                   | √                  | Reservoirs are important sources of freshwater supply and possess significant freshwater supply value. Conveyance canals are typically used to transport water for urban, agricultural irrigation, industrial, or other water resource needs. Therefore, they do not have inherent freshwater supply value. Jilin Province's aquaculture farms mainly consist of fish farming ponds, which are typically not used as a source of freshwater. |
|              | Irrigation channel (IC)          | ×                  |                                                                                                                                                                                                                                                                                                                                                                                                                                              |
|              | Aquaculture pond (AP)            | ×                  |                                                                                                                                                                                                                                                                                                                                                                                                                                              |
